# Supplementary material
Source: ML conference proceedings conference paper supplement (https://aclanthology.org/W17-4303)
Supplement: Attachment [file latent_tree_nmt_supporting.pdf › latent_tree_nmt_supporting.pdf]

## Appendix A: Randomly selected greedy translations, with induced trees

| German (source)                                                                                                                           | English (hypothesis)                                                                                                                    |
|-------------------------------------------------------------------------------------------------------------------------------------------|-----------------------------------------------------------------------------------------------------------------------------------------|
| [[[Ein ][Bauarbeiter ][in ][einem ][schwarzen ][T-Shirt] [und ][Jeans ][stellt] [seine ][Leiter] [auf.]]                                  | [[[[A ][construction] ][worke]r][in ][a ][black ][t-shirt] ][and ][jean]s[putting][his ][ladde]r.]                                      |
| [[[Eine ][Frau ][und ][ein ][kleiner ][Junge ][teilen] ][sich ][einen ][Stuhl].]                                                          | [[[[A ][woman] ][and ][a ][small ][boy] ][sharing][a ][chair].]                                                                         |
| [[[Ein ][Mann ][in ][einem ][schwarzen ][Neoprenanzug] [surft] [auf ][einer ][Welle].]                                                    | [[[[A ][man] ][in ][a ][black ][wetsuit] ][is] [surfing] [on ][a ][wave].]                                                              |
| [[[Zwei ][kleine ][asiatische ][Jungen ][streiten] ][miteinander.]]                                                                       | [[[[Two ][young ][Asian] ][boy]s[are] [strumming][with ][each ][other].]                                                                |
| [[[Eine ][ältere ][weißhaarige ][Frau ][sieht] ][in ][ihre ][Kasse] [und ][blickt] [durch ][ihre ][Brille]ngläser [hindurch.]]            | [[[[An ][older ][white ][woman] ][looking] ][at ][the ][cheese ][of ][their ][cheeks] ][and ][looking] [at ][the ][water][cheek].]      |
| [[[Da ][ist ][ein ][Mann,] ][der ][in ][irgen]deine [Decke] [gewickelt] [ist] [und ][einen ][schneebedeckten ][Hügel] [herunter]rutscht.] | [[[There ][is ][a ][man] ][with ][a ][man][with ][a] [snowy] [high] [is] [snow-covered][hill] ][in] [some] [blanket]s.]                 |
| [[[Ein ][Mann ][mit ][Brille] ][am ][Mikrofon] [blickt] [auf ][irgendein ][Schrift]stück [hinunter].]                                     | [[[[A ][man] ][with ][glasses] ][looks] ][down] [at] [some] [sort] [of] [writte]n.]                                                     |
| [[[Ich ][sehe ][einen ][bärtigen ][Mann ][und ][eine ][ältere ][Dame,] ][die ][sich ][eine ][Schüssel] [mit ][Essen] [teilen].]           | [[[[Ice ][child] ][show] ][a ][bearded] ][man][and] [an] [older] [boy][standing][with ][a ][bowl] [with ][a ][bowl] [with ][a ][bow]l.] |
| [[[Ein ][kleines ][asiatisches ][Mädchen ][rennt] ][entlang] [einer ][gepflasterten ][Straße] [in ][den ][Fokus].]                        | [[[[A ][little ][Asian] ][girl] ][runs][along] [a] [paved] [road][in] [the] [mountains].]                                               |
| [[[Drei ][Menschen ][knien] ][oder ][stehen] [in ][der ][Nähe ][des ][Wasser]s [am ][Strand].]                                            | [[[[Three] [people] ][kneeling] ][or] [standing][near] [the] [water][near] [the] [water].]                                              |
| [[[Junge ][Menschen] ][sind] [mit ][einem ][Spiel] [beschäftigt].]                                                                        | [[[[Young] [people] ][are] ][walking][with ][a] [game].]                                                                                |
| [[[Ein ][Radfahrer] ][vollführt] [einen ][Sprung] [in ][einem ][Wald].]                                                                   | [[[[A ][biker] ][performs] [a] [jump] [in] [a] [forest].]                                                                               |
| [[[Zwei ][Mädchen ][spielen] ][mit ][ihrem ][Hund] [auf ][einem ][Baum].]                                                                 | [[[[Two] [girls] ][playing] ][with] [their] [dog][on] [a] [tree].]                                                                      |
| [[[Mann ][und ][Junge ][spielen] ][bei ][Sonnenuntergang] [mit ][einem ][Hund] [am ][Strand].]                                            | [[[Man] ][and] [boy] [playing][with] [a] [dog][at] [sunset][with] [a] [dog][on] [the] [beach].]                                         |
